# Supplementary material
Source: PubMed Central journal article supplement (PMC4909134)
Supplement: supp_msw001_supplement_figure_S1.pdf [file supp_msw001_supplement_figure_S1.pdf]

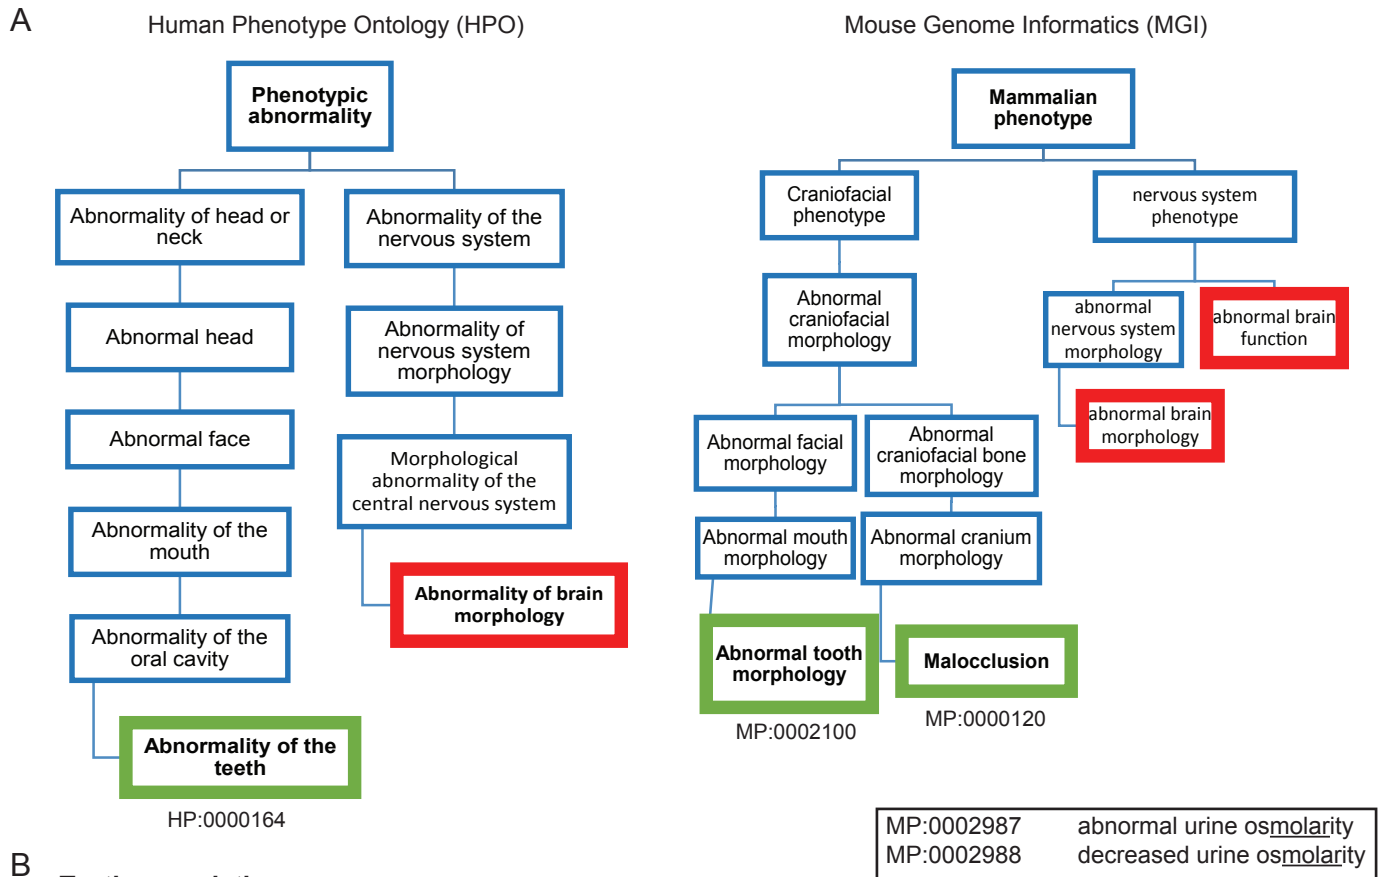

**B**

**Teeth associations:**

|                                                                    |            |        |                                                                                                                          |
|--------------------------------------------------------------------|------------|--------|--------------------------------------------------------------------------------------------------------------------------|
| 'Lpremolar spacing of lower premolars'                             | cne.194306 | COL3A1 | HP:0000164,HP:0000670,HP:0006323,HP:0006480,HP:0006481,HP:0006482,HP:0011061                                             |
| 'Lpremolar spacing of lower premolars'                             | cne.248858 | SLC2A9 | MP:0002987,MP:0002988                                                                                                    |
| 'Lpremolar spacing of lower premolars'                             | cne.358541 | TRPS1  | HP:0000164,HP:0000670,HP:0000684,HP:0000692,HP:0006483,HP:0011069,HP:0000678,HP:0000689,HP:0006292,HP:0006482,HP:0011061 |
| 'Lpremolar spacing of lower premolars'                             | cne.358684 | TRPS1  | HP:0000164,HP:0000670,HP:0000684,HP:0000692,HP:0006483,HP:0011069,HP:0000678,HP:0000689,HP:0006292,HP:0006482,HP:0011061 |
| 'Lpremolar spacing of lower premolars'                             | cne.358988 | EXT1   | HP:0000164                                                                                                               |
| 'Lpremolar spacing of lower premolars'                             | cne.63397  | CTSC   | HP:0000164,HP:0006323,HP:0006480,HP:0006481,HP:0006483,HP:0009804                                                        |
| 'i3 presence of Li3'                                               | cne.298759 | MSX2   | MP:0000120,MP:0000124,MP:0000126,MP:0002100,MP:0000116,MP:0000118,MP:0003930                                             |
| 'i3 presence of Li3'                                               | cne.30352  | USH2A  | HP:0000164,HP:0000670,HP:0000682,HP:0006482,HP:0011061,HP:0011073                                                        |
| 'i3 presence of UI3'                                               | cne.68000  | PVRL1  | MP:0002100,HP:0000164,HP:0000670,HP:0006483,HP:0009804,MP:0000116,MP:0002817,MP:0003930,HP:0000682,HP:0006482,HP:0011061 |
| 'Teeth carnassial shearing presence'                               | cne.194293 | COL3A1 | HP:0000164,HP:0000670,HP:0006323,HP:0006480,HP:0006481,HP:0006482,HP:0011061                                             |
| 'Teeth presence of bone between each alveolus for the upper teeth' | cne.261430 | PITX2  | MP:0000120,MP:0002100,HP:0000164,HP:0000692,HP:0006483,HP:0009804,MP:0000116,MP:0000118,HP:0000689,HP:0006482            |

10/11 CNEs 8/9 Genes

**C**

| Trait type (tissue/organ) | CNE mapping accuracy | Gene mapping accuracy | Morphobank trait                                                    | Gene         | MGI/HPO term                                                 |
|---------------------------|----------------------|-----------------------|---------------------------------------------------------------------|--------------|--------------------------------------------------------------|
| Teeth                     | 10/11 (90.9%)        | 8/9 (88.9%)           | 'p4 presence of <u>tooth</u> at Lp4'                                | <i>NFIC</i>  | MP:0000116<br>Abnormal <u>tooth</u> development              |
| Brain                     | 78/87 (89.7%)        | 79/89 (88.8%)         | 'Brain – <u>inferior colliculus</u> exposure presence'              | <i>KAT6B</i> | MP:0000776<br>Abnormal <u>inferior colliculus</u> morphology |
| Liver                     | 5/5 (100%)           | 4/4 (100%)            | ' <u>Liver</u> lobe fusion - caudate and left lateral lobes fusion' | <i>WWOX</i>  | MP:0000598<br>Abnormal <u>liver</u> morphology               |
| Forelimb                  | 24/28 (85.7%)        | 22/26 (84.6%)         | ' <u>Radius</u> , Styloid process, presence'                        | <i>EGR2</i>  | MP:0000552<br>Abnormal <u>radius</u> morphology              |
| Genitourinary system      | 55/57 (96.5%)        | 53/55 (96.4%)         | 'UG Tract - <u>Urethral</u> process presence'                       | <i>BDNF</i>  | HP:0000795<br>Abnormality of the <u>urethra</u>              |
| Prenatal development      | 37/42 (88.1%)        | 28/33 (84.8%)         | 'Development - Fenestrated <u>trophoblast</u> '                     | <i>NRK</i>   | MP:0005031<br>Abnormal <u>trophoblast</u> layer morphology   |
